# Supplementary material
Source: Springer Nature journal article supplement (https://www.springermedizin.de/resource/supplementary/12879_2009_1158_MOESM2_ESM.pdf/9441978)

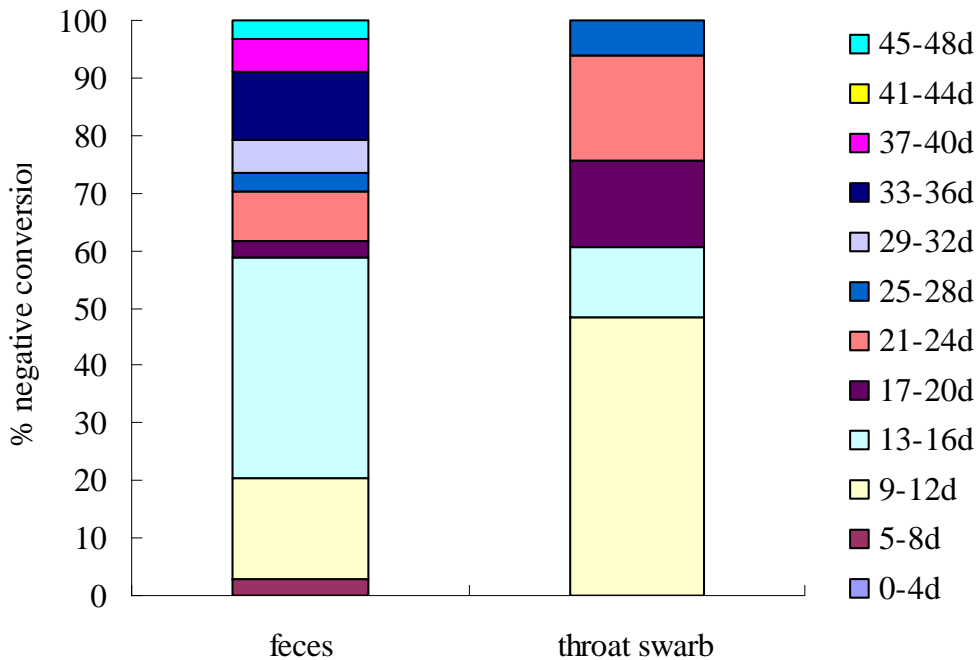

Supplement: MOESM2 [file 9441978]
